# Supplementary material
Source: Springer Nature journal article supplement (https://www.springermedizin.de/resource/supplementary/12875_2013_1031_MOESM4_ESM.pdf/9436014)
Supplement: MOESM4 [file 9436014]

PATIENT

COST

COST

Initially - Negative  
• More time spent/patient

Positive  
• Avoids unnecessary potentially harmful CDPS

**BETTER APPROACH to CDPS**

**1 Comprehensive, Proactive**

- Includes multiple evidence-based CDPS maneuvers
- Selects at risk patients for a CDPS visit

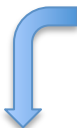

**2 Individualized and Personalized CDPS**

- Identifies eligible CDPS tailored to the patient

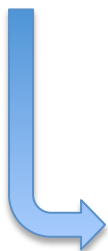

**3 Integrated Continuity**

- Patient referred to appropriate resource
- Internal and/or external to the practice setting
- Other clinicians in the practice made aware of patients' CDPS goals

**OTHER APPROACH to CDPS**

1. Disease or condition focused
2. Not individualized
3. May not be integrated with patients' primary care provider

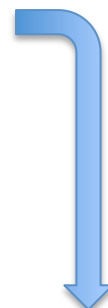

**CDPS Focused Resources**  
(e.g. colon cancer screening, diabetes workshop, etc.)

- Specific tests
- Workshops focused on specific condition

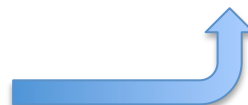

Initially - Positive  
• Less time spent/patient

Negative  
• If not individualized inappropriate tests may be ordered (e.g. colon cancer screen in low risk groups)
